# Supplementary material for: Proteomics of Mouse Heart Ventricles Reveals Mitochondria and Metabolism as Major Targets of a Post-Infarction Short-Acting GLP1Ra-Therapy
Source: MDPI journal article supplement (doi:10.3390/ijms22168711), 2021-08-13
Supplement: s1 [file s1]

**Table S1.** Differentially expressed (DE) mitochondrial proteins throughout the course of early remodeling

| Vehicle              | Upregulated                                                                                        | Downregulated                                                                                                                                                                                                                                                                                                                                                                                                                                                                                                                 | DMB                  | Upregulated                                                                                                                   | Downregulated                                                                                                                                                                                                                                                                                                                                                                                                                                                                                                                                                                                                                           |
|----------------------|----------------------------------------------------------------------------------------------------|-------------------------------------------------------------------------------------------------------------------------------------------------------------------------------------------------------------------------------------------------------------------------------------------------------------------------------------------------------------------------------------------------------------------------------------------------------------------------------------------------------------------------------|----------------------|-------------------------------------------------------------------------------------------------------------------------------|-----------------------------------------------------------------------------------------------------------------------------------------------------------------------------------------------------------------------------------------------------------------------------------------------------------------------------------------------------------------------------------------------------------------------------------------------------------------------------------------------------------------------------------------------------------------------------------------------------------------------------------------|
| Day 1<br>vs<br>Naive | AIFM1, CATB, CLH1, CLUS, CMC1, COX5B, CX6A2, CY1, GBLP, GRP78, MIC60, ODPB, PDIA3, QCR8<br><br>SAP | ABHDB, ACADL, ACON, ACOT2, ACS2L, ACSL1, ADCK3, ALDOA, ATP5J, BCAT2, CISY, CLYBL, CYC, ETFA, ETFB, FIS1, IDHP, ISC2A, LDHA, LDHB, MDHC, MSRA, MUTA, MYH6, NDUA9, NDUV2, ODP2, ODPB, SCOT1, SSDH, SUCA, THIM<br><br>UBA1                                                                                                                                                                                                                                                                                                       | Day 1<br>vs<br>Naive | AMPL, ATPG, CATB, CLH1, CLUS, CMC1, COF1, COX5A, CY1, DNJA3, GBLP, GRP78, KAD3, MIC19, MIC60, MSRB2, OPA1, PDIA3<br><br>VDAC1 | AL4A1, DMD, ETFB, HXK1, HXK2, IDHP, ISC2A, LDHA, MYH6, NDUA9, ODP2, UBA1                                                                                                                                                                                                                                                                                                                                                                                                                                                                                                                                                                |
| Day 3<br>vs<br>Day 1 | CALM, CATB, CLH1, CLIC4, COF1, CRYAB, CX7A1, FIS1, HNRPK, KP YM, LDHA, NDUA4, TGM2                 | ACADV, ACDSB, ACO13, ACPM, ACSL1, ADCK3, AIFM1, CACP, COQ5, COX5B, ECHA, ECI2, ES1, ETHE1, HXK2, KCRS, LDHB, LONM, MMSA, MUTA, NDUBA, NDUS7, NLTP, NNRE, NUCG, ODP2, PCCB, PDK2, PRDX5, SUCB1, SYIM, THIL, TIM13, VWA8                                                                                                                                                                                                                                                                                                        | Day 3<br>vs<br>Day 1 | 1433Z, ANXA1, CATB, CATD, CLH1, CLIC1, CLIC4, COF1, CRYAB, DMD, GRP78, HSPB7, PDIA3, SAP, THIO, TRAP1                         | AATM, ACADL, ACADM, ACADS, ACADV, ACD10, ACDSB, ACON, ACSF2, ADCK3, AMPL, AT5F1, ATP5H, ATPA, ATPB, ATPD, CH60, CLYBL, COX41, COX5A, COX5B, CX6A1, CX6B1, CY1, CYC, DCMC, DHPR, DHRS4, DLDH, DNJA3, ECH1, EFTU, ETFA, ETFB, ETFD, ETHE1, FUMH, GRP75, GRPE1, GSTA4, HCD2, IDH3A, IDHC, ISCA2, IVD, KAD3, KAT3, KCRS, L2HDH, LDHB, LONM, MCEE, MDHC, MDHM, MIC13, MIC19, MIC60, MYH6, NDUA5, NDUAB, NDUBA, NDUBB, NDUS1, NDUS3, NDUS6, NDUV2, ODO1, ODO2, ODPA, ODPX, OPA1, PDK2, PDK4, PFD2, PHB, PHB2, PRDX3, PRDX5, PTRF, QCR1, SCOT1, SDHA, SDHB, SODM, SUCA, SUOX, TACO1, THIL, THIM, THIOM, TIM13, TIM44, UCRI, VDAC1, VDAC3, VWA8 |
| Day 7<br>vs<br>Day 3 | ANXA1, CATB, CATD, CLH1, CLIC1, DNM1L, DPYL2, G3P, HXK1, LEG3, MUTA, PDIA3, PUR9, SAP, UBA1        | AATM, ACADL, ACADM, ACADS, ACADV, ACD10, ACON, ACOT2, ACOX1, ACPM, ARG1I, ATP5H, ATPB, ATPD, ATPG, ATPO, CATA, CH60, CLUS, CLYBL, CMC1, COQ3, CRYAB, CY1, DCMC, DECR, DHB8, DHRS4, DLDH, ECH1, ECHA, ECI1, EFTU, ETFA, FIS1, FUMH, GSTK1, IDH3A, IVD, KAD3, LPPRC, MACD1, MCCA, MDHM, MIC19, MIC60, MTX2, NDUA4, NDUA5, NDUAA, NDUF3, NDUS1, NDUS2, NDUS3, NDUS6, NDUV2, NDUV3, NFU1, NIPS2, ODO1, ODO2, ODPB, ODPX, PCCA, PFD2, PHB, PHB2, PPIF, PRDX2, PRDX3, QCR1, QCR2, QCR7, QCR8, SCOT1, SDHA, SODC, SUCB1, THIM, VDAC1 | Day 7<br>vs<br>Day 3 | ANXA1, BDH, CATB, CATD, CLH1, COF1, DNM1L, G3P, GLOD4, MDHC, MYH6, PDIA3, SAP, SND1, SYVC, TGM2                               | ACADM, ACADV, ACON, ACOT2, ACPM, ACS2L, ACSL1, ACYP2, ADT1, ATPG, C1QBP, CLUS, CMC1, COQ5, COQ7, COQ9, COX5A, COX5B, CX6A2, CY1, DECR, DHB8, DLDH, ECH1, ECHA, ECHB, ECHM, ECI1, EFTU, ES1, ETFA, ETFB, FIS1, FUMH, HCDH, HIBCH, HINT2, HMGCL, IDH3A, IDHP, ISC2A, KAD4, MCCB, MDHM, MIC60, MMSA, MTX2, NDUAA, NDUAC, NDUS1, NDUS3, NDUS4, NDUV2, NDUV3, NIPS2, NIT2, ODB2, ODO1, ODO2, ODPA, ODPB, PCCA, PCCB, PHB, PHB2, PRDX3, QCR1, QCR6, SDHA, SODM, SUCA, SUCB1, THIL, THIM, VDAC1, VDAC3, VWA8                                                                                                                                   |
